# Supplementary material for: MetaCRAM: an integrated pipeline for metagenomic taxonomy identification and compression
Source: PubMed Central journal article supplement (PMC4759986; doi:10.1186/s12859-016-0932-x), 2016-02-19
Supplement: 12859_2016_932_MOESM1_ESM.pdf [file 12859_2016_932_MOESM1_ESM.pdf]

## MetaCRAM Additional File 1

### Commands to run MetaCRAM

#### Compression

```
time perl MetaCram.pl --<compress, decompress> --output <output directory> --paired  
<path to reads> --<exGolomb, huffman, golomb>
```

#### Example:

```
[shared3]$ time perl MetaCram.pl --compress --output  
/shared3/MetaCRAM_SRR359032_Huffman --paired /shared3/SRR359032_1.fasta /shared3/  
SRR359032_2.fasta --huffman &>MetaCramLOG_SRR359032_Huffman.txt
```

#### Decompression:

```
time perl decompressor.pl --input <path to folder containing the Round1 and Round2  
folders>
```

#### Example:

```
[shared3]$ time perl decompressor.pl --input  
/shared3/MetaCRAM_processedSRR359032_Huffman/MetaCRAM  
&>decompressorLogSRR359032_Huffman.txt
```

(\*--paired is optional)

(\*<> indicates a choice)

(\* to log, append "&> <log file>")

(\* "time" command to get real, user, system run time)

### Software commands/options used in MetaCRAM

#### Kraken

Input: fasta/fastq read file

Output: taxonomy identification

Command: kraken --db <database\_location> <fasta file> --threads <# threads>

Database: minikraken\_20140330

#### Bowtie2

##### **Indexing**

Input: reference genomes

Output: index of reference genomes

Command: bowtie2-build -f <list of .fna reference genome files> <Output: index result file  
name>

##### **Aligning**

Input: index of reference genomes, reads to be aligned

Output: SAM file with reads aligned to reference genomes

Command: bowtie2 --reorder --threads 4 --mm -x <index file name> -1 <read1 file name> -2 <read2 file name> -S <Output: SAM result file name> -f --no-hd --no-sq

## **IDBA\_UD**

Input: read file

Output: contig files

Command: idba\_ud --num\_threads 4 -r <read file name> -o <output directory desired>

## **BLAST**

Input: contig

Output: BLAST result (alignment to species)

Command: blastn -db nt -query <query sequence file> -out <output file name desired> - num\_threads 4 -max\_target\_seqs 1 -outfmt "6 qseqid sseqid sgi sacc stitle evalue"

### **Retrieving subject's sequence from blast database (command line)**

Input: a file containing a list of sequence IDs (accession number and GI)

Output: a fasta file with all sequences of the input file

Command: export BLASTDB=/opt/ncbi-blast-2.2.29+/db; blastdbcmd -db nt -entry\_batch <input file name> -out <output file name desired> -outfmt %f

## **CRAM**

Input: split sam file containing records pertaining to that ID (NC\_013361) and the corresponding fasta sequence with ending .fa

Output: cram file

Commands: samtools view -bT NC\_013361.fa NC\_013361.sam | samtools sort - Sorted\_NC\_013361

To compress: java -jar ../cramtools-2.1.jar cram --reference-fasta-file NC\_013361.fa --input-bam-file Sorted\_NC\_013361.bam --output-cram-file NC\_013361.cram

To decompress: java -jar ../cramtools-2.1.jar bam --input-cram-file NC\_013361.cram --reference-fasta-file NC\_013361.fa --print-sam-header > test.sam

## **MFCCompress**

Input: fasta file

Output: compressed fasta file .mfc

Command: ./MFCCompressC <filename.fa>
