# Supplementary material for: MetaCRAM: an integrated pipeline for metagenomic taxonomy identification and compression
Source: PubMed Central journal article supplement (PMC4759986; doi:10.1186/s12859-016-0932-x), 2016-02-19
Supplement: 12859_2016_932_MOESM2_ESM.pdf [file 12859_2016_932_MOESM2_ESM.pdf]

## MetaCRAM Additional File 2

### Folders and files produced after compression

assembled 

→round1 

output of IDBA\_UD: contig files

blastOUT 

→round1 

→fnaFiles 

reference files after running BLAST on contigs

blastOUT

out.fna (concatenated file of references)

blastOUT\_parsed.txt (name of reference files)

bowtieOutput 

→samSplit 

SAM files split according to the references the reads were aligned to.

bowtie outputs and indices

cramOutput 

→round1 

.bam, .cram, .fa, .fa.fai files for round 1

→round2 

.bam, .cram, .fa, .fa.fai files for round 1

krakenOutput 

KrakenOutput

KrakenOutputReport

listOfFnaFiles

Round1 

listOfFnaFiles

.cram files

Round2 

unaligned2.mfc

blastOUT\_parsed.txt

.cram files

SAMFilter 

→round1 

unaligned1

unpaired

unaligned1\_1.fna

unaligned1\_2.fna

→round2 

unaligned2

unpaired  
unaligned2\_1.fna  
unaligned2\_2.fna

📁 indicates a folder rather than a file.

Example given above is for two iterations. More iteration will have more folders named round3, round4, etc. and files accordingly.

**Round1** and **Round2** are the only folders needed for a lossless decompression.

### **Files produced after decompression**

OUT (original FASTA file containing reads, or in case of paired-end reads, the first pair)

OUT2 (in case of paired-end reads, the second pair)

sortedOUT (sorted version of OUT, according to the read IDs)

sortedOUT2 (sorted version of OUT2, according to the read IDs)

### **Example of console output of MetaCRAM**

```
[minji@algorithm shared3]$ perl MetaCram.pl --compress --output /shared3/  
MetaCRAM_SRR359032_Huffman --paired /shared3/SRR359032_1.fasta /shared3/  
/SRR359032_2.fasta --huffman
```

Making necessary directories. Done.

17345097 sequences (3486.36 Mbp) processed in 667.124s (1560.0 Kseq/m, 313.56 Mbp/m).

10127714 sequences classified (58.39%)

7217383 sequences unclassified (41.61%)

Done.

Filtering Kraken output.

Gathering .fna files

Using variation to find *Sphingobium\_sp\_SYK-6*

Using genus to find *Sphingobium\_sp\_SYK-6*

Using variation to find *Rhodanobacter\_denitrificans*

Using variation to find *Paenibacillus\_sp\_Y412MC10*

Using variation to find *Methylocystis\_sp\_SC2*

Using variation to find *Geobacter\_sp\_M18*

Filter complete.

Round 1

Running bowtie2-build. Building a SMALL index

Done.

Running bowtie2. 17345097 reads; of these:

17345097 (100.00%) were paired; of these:

7909091 (45.60%) aligned concordantly 0 times

9334717 (53.82%) aligned concordantly exactly 1 time

101289 (0.58%) aligned concordantly >1 times

----

7909091 pairs aligned concordantly 0 times; of these:

46710 (0.59%) aligned discordantly 1 time

----

7862381 pairs aligned 0 times concordantly or discordantly; of these:

15724762 mates make up the pairs; of these:

14668312 (93.28%) aligned 0 times  
1016579 (6.46%) aligned exactly 1 time  
39871 (0.25%) aligned >1 times  
57.72% overall alignment rate  
Done.  
Separating SAM file into individual species' SAM file.  
Done.  
Running CRAM.  
Opening SAM file. Done.  
Making unaligned file. Done.  
Making unpaired file. Done.  
Filtering SAM file. Done.  
Splitting unaligned into 2 files. Done.  
Running IDBA\_UD. [bam\_sort\_core] merging from 9 files...  
Done.  
BLASTing.  
Done.  
Filtering BLAST output.  
Retrieving fnas sequence from BLAST database. Done.  
Parsing BLAST fnas sequences. Done.  
Done.  
Round 2  
Running bowtie2-build. Building a SMALL index  
Done.  
Running bowtie2. 6810363 reads; of these:  
6810363 (100.00%) were paired; of these:  
6241196 (91.64%) aligned concordantly 0 times  
484436 (7.11%) aligned concordantly exactly 1 time  
84731 (1.24%) aligned concordantly >1 times  
----  
6241196 pairs aligned concordantly 0 times; of these:  
7482 (0.12%) aligned discordantly 1 time  
----  
6233714 pairs aligned 0 times concordantly or discordantly; of these:  
12467428 mates make up the pairs; of these:  
12299670 (98.65%) aligned 0 times  
139320 (1.12%) aligned exactly 1 time  
28438 (0.23%) aligned >1 times  
9.70% overall alignment rate  
Done.  
Separating SAM file into individual species' SAM file.  
Done.  
Running CRAM.  
Reading start positions. Opening SAM file. Done.  
Making unaligned file. Done.  
Making unpaired file. Done.  
Filtering SAM file. Done.  
Done.  
Splitting unaligned into 2 files. Done.  
Running MFCompress.  
Done.
