# Supplementary material for: MetaCRAM: an integrated pipeline for metagenomic taxonomy identification and compression
Source: PubMed Central journal article supplement (PMC4759986; doi:10.1186/s12859-016-0932-x), 2016-02-19
Supplement: 12859_2016_932_MOESM4_ESM.pdf [file 12859_2016_932_MOESM4_ESM.pdf]

## MetaCRAM Additional File 4

### Comparison between Kraken and MetaPhyler

We compared Kraken with MetaPhyler in terms of computation time and identification accuracy on synthetic data. The following is a list of randomly selected set of 15 species and their NC file number, and the paired-end read files were generated by MetaSim with 1% error.

Table 1. A randomly selected set of 15 species and their NC file number used for comparing different taxonomy identification tools.

| #  | NC file number | Species                            |
|----|----------------|------------------------------------|
| 1  | NC_016894      | Acetobacterium woodii              |
| 2  | NC_016795      | Brucella abortus                   |
| 3  | NC_017307      | Corynebacterium pseudotuberculosis |
| 4  | NC_013743      | Haloterrigena turkmenica           |
| 5  | NC_006512      | Idiomarina loihiensis              |
| 6  | NC_018106      | Klebsiella oxytoca                 |
| 7  | NC_008526      | Lactobacillus casei                |
| 8  | NC_003210      | Listeria monocytogenes             |
| 9  | NC_007626      | Magnetospirillum magneticum        |
| 10 | NC_009975      | Methanococcus maripaludis          |
| 11 | NC_014391      | Micromonospora aurantiaca          |
| 12 | NC_018413      | Mycoplasma gallisepticum           |
| 13 | NC_013960      | Nitrosococcus halophilus           |
| 14 | NC_007948      | Polaromonas JS666                  |
| 15 | NC_019670      | Pseudomonas putida                 |
